# Supplementary material for: Study protocol for the assessment of nurses internal contamination by antineoplastic drugs in hospital centres: a cross-sectional multicentre descriptive study
Source: PubMed Central journal article supplement — BMJ Open. 2019 Nov 10;9(11):e033040. doi: 10.1136/bmjopen-2019-033040 (PMC6858204; doi:10.1136/bmjopen-2019-033040), 2019-11-10
Supplement: bmjopen-2019-033040.draft_revisions.pdf [file bmjopen-2019-033040.draft_revisions.pdf]

# BMJ Open

BMJ Open is committed to open peer review. As part of this commitment we make the peer review history of every article we publish publicly available.

When an article is published we post the peer reviewers' comments and the authors' responses online. We also post the versions of the paper that were used during peer review. These are the versions that the peer review comments apply to.

The versions of the paper that follow are the versions that were submitted during the peer review process. They are not the versions of record or the final published versions. They should not be cited or distributed as the published version of this manuscript.

BMJ Open is an open access journal and the full, final, typeset and author-corrected version of record of the manuscript is available on our site with no access controls, subscription charges or pay-per-view fees (<http://bmjopen.bmj.com>).

If you have any questions on BMJ Open's open peer review process please email [info.bmjopen@bmj.com](mailto:info.bmjopen@bmj.com)

# BMJ Open

## A study protocol for the assessment of nurses internal contamination by antineoplastic drugs in hospital centres: a cross sectional multicentre descriptive study

|                               |                                                                                                                                                                                                                                                                                                                                                                                                                                                                                                                                                                                                                                                                                                                                                                                                                                                                                                                                                                                                                                                                                                                                              |
|-------------------------------|----------------------------------------------------------------------------------------------------------------------------------------------------------------------------------------------------------------------------------------------------------------------------------------------------------------------------------------------------------------------------------------------------------------------------------------------------------------------------------------------------------------------------------------------------------------------------------------------------------------------------------------------------------------------------------------------------------------------------------------------------------------------------------------------------------------------------------------------------------------------------------------------------------------------------------------------------------------------------------------------------------------------------------------------------------------------------------------------------------------------------------------------|
| Journal:                      | <i>BMJ Open</i>                                                                                                                                                                                                                                                                                                                                                                                                                                                                                                                                                                                                                                                                                                                                                                                                                                                                                                                                                                                                                                                                                                                              |
| Manuscript ID                 | bmjopen-2019-033040                                                                                                                                                                                                                                                                                                                                                                                                                                                                                                                                                                                                                                                                                                                                                                                                                                                                                                                                                                                                                                                                                                                          |
| Article Type:                 | Protocol                                                                                                                                                                                                                                                                                                                                                                                                                                                                                                                                                                                                                                                                                                                                                                                                                                                                                                                                                                                                                                                                                                                                     |
| Date Submitted by the Author: | 17-Jul-2019                                                                                                                                                                                                                                                                                                                                                                                                                                                                                                                                                                                                                                                                                                                                                                                                                                                                                                                                                                                                                                                                                                                                  |
| Complete List of Authors:     | Villa, Antoine; Université de Bordeaux, Inserm U1219, EPICENE; AP-HM, Consultation de pathologie professionnelle et de l'environnement<br>Molimard, Mathieu; Université de Bordeaux, Bordeaux PharmacoEpi (BPE, CIC 1401) ; CHU de Bordeaux, Laboratoire de Pharmacologie Clinique et Toxicologie<br>Bignon, Emmanuelle; Université de Bordeaux, Bordeaux PharmacoEpi (BPE, CIC 1401)<br>Martinez, Béatrice; Université de Bordeaux, Inserm U1219, EPICENE<br>Rouyer, Magali; Université de Bordeaux, Bordeaux PharmacoEpi (BPE, CIC 1401)<br>Mathoulin-Pelissier, Simone; Université de Bordeaux, Inserm U1219, EPICENE<br>Baldi, Isabelle; Université de Bordeaux, Inserm U1219 - EPICENE team; CHU de Bordeaux, GH Pellegrin, Pôle de Santé Publique, Service de Médecine du Travail et Pathologies professionnelles<br>Verdun-Esquer, Catherine; Centre Hospitalier Universitaire de Bordeaux, GH Pellegrin, Service de médecine du travail et de pathologies professionnelles<br>Canal Raffin, Mireille; Université de Bordeaux, Inserm U1219, EPICENE; CHU Bordeaux GH Pellegrin, Laboratoire de Pharmacologie Clinique et Toxicologie |
| Keywords:                     | OCCUPATIONAL & INDUSTRIAL MEDICINE, Antineoplastic drugs, Urine, Occupational exposure, Biomonitoring, Nurses                                                                                                                                                                                                                                                                                                                                                                                                                                                                                                                                                                                                                                                                                                                                                                                                                                                                                                                                                                                                                                |
|                               |                                                                                                                                                                                                                                                                                                                                                                                                                                                                                                                                                                                                                                                                                                                                                                                                                                                                                                                                                                                                                                                                                                                                              |

SCHOLARONE™  
Manuscripts

1  
2  
3  
4 A study protocol for the assessment of nurses internal contamination by antineoplastic  
5 drugs in hospital centres: a cross sectional multicentre descriptive study  
6  
7  
8

9 Antoine Villa<sup>1,2</sup>, Mathieu Molimard<sup>1,3,4</sup>, Emmanuelle Bignon<sup>5</sup>, Béatrice Martinez<sup>1,4</sup>, Magali  
10 Rouyer<sup>5</sup>, Simone Mathoulin-Pelissier<sup>1,4</sup>, Isabelle Baldi<sup>1,4,6</sup>, Catherine Verdun-Esquer<sup>6</sup>, Mireille  
11 Canal-Raffin <sup>\*,1,3,4</sup>  
12  
13

14 <sup>1</sup> INSERM U1219, Université de Bordeaux, 33076 Bordeaux, France.

15 <sup>2</sup> Consultation de Pathologie Professionnelle, Hôpital Timone, 13005 Marseille, France

16 <sup>3</sup> Laboratoire de Pharmacologie Clinique et Toxicologie, CHU de Bordeaux, 33076 Bordeaux,  
17 France.

18 <sup>4</sup> University of Bordeaux, 33076 Bordeaux, France.

19 <sup>5</sup> Bordeaux PharmacoEpi (BPE, CIC 1401), Université de Bordeaux, 33076 Bordeaux, France

20 <sup>6</sup> Service de Médecine du Travail et de Pathologies Professionnelles, CHU de Bordeaux,  
21 33076 Bordeaux, France.  
22  
23  
24  
25  
26  
27

28 \*Corresponding author: Mireille Canal-Raffin

29 Equipe Epidémiologie des Cancers, Environnement et Exposition

30 INSERM U1219, Bordeaux Population Health

31 Université de Bordeaux

32 Bât 1A, Carreire, Zone Nord, case 36

33 33076 Bordeaux cedex, France.

34 Tel: +33 (0)5 57 57 15 60 Fax: +33 (0)5 57 57 46 71

35 E-mail: mireille.canal-raffin@u-bordeaux.fr  
36  
37  
38  
39  
40  
41  
42  
43  
44  
45  
46  
47  
48  
49  
50  
51  
52  
53  
54  
55  
56  
57  
58  
59  
60

## Abstract

Introduction: Antineoplastic drugs (AD) are potentially carcinogenic and/or reprotoxic molecules. Healthcare professionals are increasingly exposed to these drugs and can be potentially contaminated by them. Internal contamination of professionals is a key concern for occupational physicians in the assessment and management of occupational risks in health care settings.

Objectives: to report AD internal contamination rate in nursing staff and identify factors associated with internal contamination.

Methods and analysis: this trial will be conducted in two French hospital centres: University Hospital of Bordeaux and IUCT-Oncopole of Toulouse. The target population is nurses practicing in one of the fifteen selected care departments where at least one of the five studied AD is handled (5-fluorouracil, cyclophosphamide, doxorubicin, ifosfamide, methotrexate). The trial will be conducted with the following steps: (1) development of analytical methods to quantify AD urine biomarkers, (2) study of the workplace and organization around AD in each care department (transport and handling, professional practices, personal and collective protection equipments available) (3) development of a self-questionnaire detailing professional activities during the day of inclusion, (4) nurses inclusion (urine samples and self-questionnaire collection), (5) urine assays, (6) data analysis. Ethics and dissemination: The study protocol has been approved by the French Advisory Committee on the Treatment of Information in Health Research (CCTIRS) and by the French Data Protection Authority (CNIL). Following the opinion of the Regional Committee for the Protection of Persons, this study is outside the scope of the provisions governing biomedical research and routine care (n°2014/87). The results will be submitted to peer-reviewed journals and reported at suitable national and international meetings.

Trial registration number: NCT03137641, April 28, 2017

**Strengths and limitations of this study:**

The analytical methods used needs to be specific and highly sensitive, which is essential for reliable detection and to reduce the number of misclassifications as uncontaminated.

Exposure biomarkers of five antineoplastic drugs will be analysed in each urine sample.

The care departments of the study are selected among different medical specialties.

The data from the self-questionnaires coupled with the results of the urine assays will serve to identify factors associated with internal contamination.

This study will only assess the internal contamination of nurses.

For peer review only

## Introduction:

The number of cancer cases is constantly increasing worldwide and consequently, the administration of antineoplastic drugs (AD) is more and more widespread. In France, more than 320,000 people were treated with AD in 2015.<sup>1</sup> This leads to an increase in the use of these products by health professionals in terms of frequency and quantities handled and therefore to an increase in occupational exposure to these substances. According to the Sumer survey conducted with occupational physicians in 2010, more than 49,400 employees were potentially exposed to these drugs in France<sup>2</sup> and more than 5.5 million employees in the United States in 2003.<sup>3</sup>

Several professions are concerned by this exposure, including pharmacist technicians, pharmacists, couriers, nurses, assistant nurses, hospital agents, doctors, etc. Several international studies conducted between the 1980s and 2003 report that pharmacist assistants and nurses handling these drugs were contaminated, with rates exceeding 75% or even 90% of staff in some studies.<sup>4-6</sup> The best approach to measure internal contamination is biomonitoring, *i.e.* AD detection in urines of exposed healthcare professionals.

More than one hundred AD are currently marketed in France.<sup>7</sup> Most are on the list of "dangerous to handle" medicines issued by the US National Institute for Occupational Research and Safety (NIOSH) in 2004<sup>3</sup> because of their carcinogenic, mutagenic and/or reprotoxic effects (CMR). Thirty-eight AD have been evaluated by IARC: 13 are classified as a human carcinogens (group 1), 11 as probably carcinogen (group 2A), 7 may be carcinogenic (group 2B), and 7 are not classifiable for human carcinogenicity (group 3).

Since the 1970s, epidemiological studies conducted with nurses handling AD have shown an increase in risk of cancers<sup>8 9</sup> such as leukemias<sup>8</sup> and/or reprotoxic effects. The reported reprotoxic effects are: spontaneous abortions,<sup>10-16</sup> fetal malformations,<sup>9 17-20</sup> decreased fertility,<sup>16 21 22</sup> risk of uterine growth retardation and prematurity.<sup>22</sup> In the absence of reference biological value for occupational AD exposure, the long-term effects of occupational low-intensity exposure to these CMR products should lead to a reduction in exposures to the lowest possible level.

During occupational exposure, the contamination can take place by the respiratory and/or cutaneous and/or oral route.<sup>23</sup> It can occur directly during the reception, preparation, transport, injection of the drug and the handling of waste or indirectly through the patients and their excreta (vomit, urine, stool, sweat), sheets and soiled linen.<sup>23 24</sup> In order to limit these exposures and to guarantee the safety of employees, centralized reconstitution units for chemotherapies have been created in healthcare establishments and recommendations have been drawn up by government agencies and other occupational health organizations.<sup>3</sup> Despite the recommendations and the improvements made in terms of safety on the handling and transport of these drugs, several recent studies show that the problem of contamination is still relevant, both in the working environment<sup>23 25 26</sup> and for the professionals themselves.<sup>25 27-29</sup> These internal contamination data show that preventive measures are not sufficiently controlled. It is thus necessary to understand the determinants of exposure.

Very little current data are available on the internal contamination of French healthcare professionals exposed to AD. The CACIES protocol detailed in this paper, aims to collect data on AD internal contamination in nurses and understand factors associated with this contamination.

## Objectives:

1  
2  
3 The main objective of the CACIES protocol is to evaluate the rate of internal contamination  
4 by AD in nurses administering AD and/or taking care of patients treated with these  
5 molecules, in two French hospitals. This rate will be described globally and then stratified by  
6 care department.  
7

8 The secondary objectives are: (I) to describe for each studied AD the rate of internal  
9 contamination among the nurses in the study, and the concentrations associated with this  
10 contamination; (II) to identify factors associated with internal contamination in this study  
11 (exposure characteristics and use of protective equipments by nurses).  
12  
13

#### 14 **Methods and analysis:**

15 CACIES is a cross-sectional, descriptive, prospective multicentre study conducted in two  
16 French hospitals (University Hospital of Bordeaux and IUCT- Oncopole of Toulouse).

17 Eleven hospitals care departments, having an activity in the management of cancer patients  
18 treated with any of the following AD: cyclophosphamide, ifosfamide, methotrexate, 5-  
19 fluorouracil and/or doxorubicin, were chosen for this study.  
20

21 The target population is nurses occupationally exposed to the studied AD.  
22  
23

#### 24 **Eligibility criteria**

25 The three following inclusion criteria are required: (1) be a nurse practising in one of the  
26 selected care departments where at least one of the five studied AD is handled; (2) handle at  
27 least one of the five studied AD and/or take care of a patient treated with one of the five  
28 studied AD on the day of study participation (i.e day of urine samples collection); (3) agree to  
29 participate in the study and sign the participation consent form.  
30

31 The exclusion criteria are: (1) be a student nurse; (2) be treated with one of the five studied  
32 AD or have been treated with any in the year prior to the day of study participation; (3) have  
33 at home a person treated with one of the five studied AD, in the month before the day of  
34 study participation.  
35  
36

#### 37 **Study design**

38 The study will be conducted in six steps.  
39  
40

41 **Step 1: Development of analytical methods for quantification of AD urine biomarkers**

42 Analytical methods will be developed in the Pharmacology and Toxicology Laboratory of the  
43 Bordeaux University Hospital. These methods use an ultra-high-performance liquid  
44 chromatography system coupled with tandem mass spectrometry (UHPLC-MS/MS)  
45 characterized by high sensitivity and high specificity (5500 QTrap, Sciex®). AD urine  
46 biomarkers will be the AD themselves with the exception of 5-fluorouracil, which is not  
47 detectable in urine. For this molecule, its urinary metabolite, alfa-fluoro-beta-alanine (FBAL),  
48 will be assayed to assess internal contamination. Two methods have been already  
49 validated<sup>30</sup> but the limit of quantification (LOQ) will be improved. Two other methods will be  
50 developed for this study for the determination of doxorubicin and 5-fluorouracil urine  
51 biomarkers. These methods will be robust and highly sensitive with LOQ adapted to this type  
52 of study: i.e. very low LOQ values allowing detection of urine AD traces of the order of ng/L.  
53  
54  
55  
56

57 **Step 2: Study of the workplace and organization around AD in each care department**

58 A hygienist of the Occupational Medicine department will observe the activities around AD  
59 in each selected care department at the end of the urine sample and self-questionnaire  
60

1  
2  
3 collection. Collective and individual protection equipment available in each department as  
4 well as the professional practices observed will be reported in this study of the workplace. A  
5 description of the complete organization around AD and excreta of treated patients within  
6 each care department will also be carried out: AD reception in the department,  
7 administration to patients, disposal of waste. All these observations will be collected and  
8 reported in a standardized way for each care department.  
9  
10

### 11 Step 3: Development of a self-questionnaire

12 A self-questionnaire will be built with the aim to collect several data: socio-demographic and  
13 occupational data (table 1), data concerning AD handling on the day of inclusion (table 2),  
14 data concerning take care modalities of AD treated patient (table 3), and personal protective  
15 equipment (PPE) worn the day of inclusion (table 4).  
16

17 For each task listed in tables 2 and 3, the influence of the questionnaire on the nurse  
18 practices on the day of participation and for the future is asked. For each task listed in tables  
19 2 and 3, personal protective equipments (table 4) that the nurse wears the day of inclusion  
20 are asked. For each task the PPE list is exhaustive so as not to influence the nurse in the  
21 choice of PPE according to the task.  
22  
23

### 24 Step 4: Nurses inclusion

25 For each nurse, the study participation lasts 24 hours. Three urine samples will be collected  
26 at different times in less than 24 hours (Figure 1). A document gathering the date and times  
27 of urine samples will be attached to the samples. Urine samples will be sent to the  
28 pharmacology and toxicology laboratory of Bordeaux university hospital within 72h at +4°C.  
29 Then samples will be aliquoted and stored at -20°C until analysis. At the same time, nurses  
30 will complete a self-questionnaire concerning their professional activity throughout the AD  
31 handling day. Each self-questionnaire will be sent by mail (return postage paid envelopes) to  
32 the Coordinating Centre, which will monitor the completed data.  
33  
34  
35

### 36 Step 5: Urine assays

37 For each urine sample, four extraction methods followed by a validated analytical method  
38 will be performed. The result will be expressed according to the AD concentration level (ng/L  
39 and ng/g of urinary creatinine). Participant will be considered as contaminated when at least  
40 one of the five studied AD, is detected in at least one of the three collected urine samples.  
41  
42

### 43 Step 6: Data analysis

44 Statistical analyzes will be performed using SAS® software (SAS Institute, v9.3, North  
45 Carolina, USA) by a statistician from the Coordinating Centre.  
46

47 The rate of internal contamination will be calculated by reporting the number of  
48 contaminated subjects by at least one of the studied AD to the total number of subjects  
49 included and will be expressed as a percentage. This proportion will be estimated globally  
50 then detailed by molecule and department. The extent of the concentration levels achieved  
51 will also be described for each sampling time and each drug.  
52

53 The statistical analysis will include a global descriptive analysis of collected data from the  
54 self-administered questionnaire. Then factors associated with internal contamination of  
55 nurses will be studied using a multivariate logistic regression model. An univariate analysis  
56 will be used to select the variables which will be included into the multivariate model at the  
57 significance level of 25%. A step-by-step method will be used to select the significant  
58  
59  
60



1  
2  
3 variables at the 5% threshold in the final multivariate model. Interactions and confounders  
4 will be sought and tested throughout the modeling.  
5  
6

### 7 **Endpoints:**

8 The primary endpoint will be the absence or presence of internal AD contamination for each  
9 nurse. It will be determined in the light of AD urine assays results. A subject will be  
10 considered contaminated if at least one of the five AD is detected in at least one of the three  
11 urine samples.  
12

13 Others endpoints will be studied:

- 14 - AD internal contamination stratified by drug and by sampling times (S1, S2, S3).
- 15 - Descriptions of the studied population from the self-questionnaire data: (I) socio-  
16 demographic data; (II) occupational data; (III) AD handling data (IV) take care modalities of  
17 treated patients by studied AD. This description will be stratified by centre and by  
18 department (stratification conditioned by the number of participants)

19 Following these descriptions, the factors, described above, associated with internal  
20 contamination of nurses will be studied.  
21  
22

### 23 **Calculation of the number of participants:**

24 The main objective is to estimate the rate of nurse internal AD contamination in two  
25 hospitals. Thus, no sample size calculation will be made for the main criterion since it will be  
26 estimated from the total eligible population. Given the total number of nurses working in  
27 the 11 selected care departments to participate in the study, 300 nurses are potentially  
28 eligible.  
29

30 Since this protocol is not very constraining for participants, with only one day of inclusion  
31 and only three noninvasive urinary samples, we expect a participation rate around 75% for  
32 the nursing staff. With this participation rate, the number of recruited subjects expected for  
33 this study will be about 225 subjects.  
34  
35

### 36 **Impact of the study:**

37 The impact of this study will be: (1) the assessment of the rate of nurses internal  
38 contamination in care departments, (2) awareness of nurses about their contamination, (3)  
39 implementation of corrective actions, (4) improvement of AD handling and transport safety,  
40 (5) improvement of nurse professional practices and particularly the use of protection  
41 equipment, (6) powerful (highly sensitive) analytical tools set up in the laboratory, adapted  
42 to the follow-up of professionals exposed to "dangerous handling drugs", and available for  
43 occupational physicians.  
44  
45  
46

### 47 **Patient and public involvement:**

48 The research question and the protocol has been developed without the assistance of  
49 exposed nurses. On the other hand, before inclusion some nurses will be observed during  
50 their professional activity in the aim to build an adapted self-questionnaire. This will then be  
51 tested by nurses before the beginning of inclusion. Representative workers of hospital  
52 personnel, managers of the two hospitals, health managers will be informed of the study.  
53 Each nurse from the selected care departments will receive a briefing note prior to inclusion  
54 and will be invited to participate in an information meeting about CACIES study.  
55  
56  
57

### 58 **Ethics and dissemination:**

1  
2  
3 The study protocol has been approved by the French Advisory Committee on the Treatment  
4 of Information in Health Research (CCTIRS) and by the French Data Protection Authority  
5 (CNIL).

6 Collected data will be subject to a computerized treatment in the Coordinating Centre of this  
7 study (Research Platform in Pharmacoepidemiology, BPE, CIC Bordeaux CIC1401) in  
8 compliance with law n ° 78-17 (January 6, 1978) relating to data processing, files and  
9 freedoms modified by the French law 2004-801 (August 6, 2004). Collected data will be kept  
10 during five years.

11 The results from this study will be submitted to peer-reviewed journals and reported at  
12 suitable national and international conferences or workshops.

### 13 **Author affiliations**

14 <sup>1</sup> INSERM U1219, Université de Bordeaux, 33076 Bordeaux, France.

15 <sup>2</sup> Consultation de Pathologie Professionnelle, Hôpital Timone, 13005 Marseille, France

16 <sup>3</sup> Laboratoire de Pharmacologie Clinique et Toxicologie, CHU de Bordeaux, 33076 Bordeaux,  
17 France.

18 <sup>4</sup> University of Bordeaux, 33076 Bordeaux, France.

19 <sup>5</sup> Bordeaux PharmacoEpi (BPE, CIC 1401), Université de Bordeaux, 33076 Bordeaux, France

20 <sup>6</sup> Service de Médecine du Travail et de Pathologies Professionnelles, CHU de Bordeaux,  
21 33076 Bordeaux, France.

### 22 **Contributors**

23 MCR, MM designed the initial study concept,  
24 CVE, AV, IB, SMP, BM, contributed to the design of the study and development of the  
25 protocol,

26 MCR, CVE, EB, AV, MR, participate to develop the self-questionnaire,

27 AV, MCR wrote the manuscript with the contributions of others authors for each work  
28 packages.

29 All authors have taken part in the academic discussions of the manuscript's content, and in  
30 revising the article.

31 All authors read and approved the final manuscript.

32 We apologized Pr Nicholas Moore for his proofreading.

### 33 **Funding**

34 This work represents independent research. It is supported by a grant from the French  
35 Ministry of Health (grant reference number [PHRC-I n°13-077]).

### 36 **Competing interests**

37 The authors declare that they have no competing interests.

### 38 **Patient consent for publication**

39 Not required

### 40 **Ethics approval**

41 Following the opinion of the French Regional Ethic Committee for the Protection of Persons  
42 (CPP n° 2014/87), this study is considered as outside the scope of the provisions governing  
43 biomedical research and routine care. Indeed, CACIES is an observational study which does  
44

not modify working methods and/or the use of protective equipment. The study protocol has been approved by the French Advisory Committee on the Treatment of Information in Health Research (CCTIRS) and by the French Data Protection Authority (CNIL).

This study is registered on the ClinicalTrials.gov website, under the number NCT03137641.

### Provenance and peer review

Not commissioned; externally peer-reviewed.

### References.

1. Anonymous. [Healthcare]: French National Cancer Institute; 2019 [Available from: <http://lesdonnees.e-cancer.fr/Themes/Soins> accessed 12 July 2019].
2. Amira S. [Occupational risks by profession. 2010 Sumer study]. SynthèseStat' Direction de l'animation de la recherche, des études et des statistiques (DARES), 2014:1-221.
3. Anonymous. NIOSH ALERT : Preventing Occupational Exposures to Antineoplastic and Other Hazardous Drugs in Health Care Settings (Publication n°2004-165): Centers for Disease Control and Prevention - National Institute for Occupational Safety and Health, 2004:58.
4. Sessink PJ, Boer KA, Scheefhals AP, et al. Occupational exposure to antineoplastic agents at several departments in a hospital. Environmental contamination and excretion of cyclophosphamide and ifosfamide in urine of exposed workers. *Int Arch Occup Environ Health* 1992;64(2):105-12. [published Online First: 1992/01/01]
5. Sessink PJ, Verplanke AJ, Herber RF, et al. Occupational exposure to antineoplastic agents and parameters for renal dysfunction. *Int Arch Occup Environ Health* 1997;69(3):215-8. [published Online First: 1997/01/01]
6. Ensslin AS, Stoll Y, Pethran A, et al. Biological monitoring of cyclophosphamide and ifosfamide in urine of hospital personnel occupationally exposed to cytostatic drugs. *Occup Environ Med* 1994;51(4):229-33. doi: 10.1136/oem.51.4.229 [published Online First: 1994/04/01]
7. Anonymous. NIOSH List of Antineoplastic and Other Hazardous Drugs in Healthcare Settings (Publication No. 2016–161): Department of health and human services. Centers for Disease Control and Prevention. National Institute for Occupational Safety and Health, 2016:42.
8. Skov T, Maarup B, Olsen J, et al. Leukaemia and reproductive outcome among nurses handling antineoplastic drugs. *Br J Ind Med* 1992;49(12):855-61. doi: 10.1136/oem.49.12.855 [published Online First: 1992/12/01]
9. Ratner PA, Spinelli JJ, Beking K, et al. Cancer incidence and adverse pregnancy outcome in registered nurses potentially exposed to antineoplastic drugs. *BMC Nurs* 2010;9:15. doi: 10.1186/1472-6955-9-15 [published Online First: 2010/09/18]
10. Selevan SG, Lindbohm ML, Hornung RW, et al. A study of occupational exposure to antineoplastic drugs and fetal loss in nurses. *N Engl J Med* 1985;313(19):1173-8. doi: 10.1056/NEJM198511073131901 [published Online First: 1985/11/07]
11. Rogers B, Emmett EA. Handling antineoplastic agents: urine mutagenicity in nurses. *Image J Nurs Sch* 1987;19(3):108-13. [published Online First: 1987/01/01]
12. Stucker I, Caillard JF, Collin R, et al. Risk of spontaneous abortion among nurses handling antineoplastic drugs. *Scand J Work Environ Health* 1990;16(2):102-7. [published Online First: 1990/04/01]

13. Valanis B, Vollmer WM, Steele P. Occupational exposure to antineoplastic agents: self-reported miscarriages and stillbirths among nurses and pharmacists. *J Occup Environ Med* 1999;41(8):632-8. [published Online First: 1999/08/24]
14. Lawson CC, Rocheleau CM, Whelan EA, et al. Occupational exposures among nurses and risk of spontaneous abortion. *Am J Obstet Gynecol* 2012;206(4):327 e1-8. doi: 10.1016/j.ajog.2011.12.030 [published Online First: 2012/02/07]
15. Dranitsaris G, Johnston M, Poirier S, et al. Are health care providers who work with cancer drugs at an increased risk for toxic events? A systematic review and meta-analysis of the literature. *J Oncol Pharm Pract* 2005;11(2):69-78. doi: 10.1191/1078155205jp155oa [published Online First: 2006/02/10]
16. Zhang X, Zheng Q, Lv Y, et al. Evaluation of adverse health risks associated with antineoplastic drug exposure in nurses at two Chinese hospitals: The effects of implementing a pharmacy intravenous admixture service. *Am J Ind Med* 2016;59(4):264-73. doi: 10.1002/ajim.22553 [published Online First: 2016/02/24]
17. Hemminki K, Kyyronen P, Lindbohm ML. Spontaneous abortions and malformations in the offspring of nurses exposed to anaesthetic gases, cytostatic drugs, and other potential hazards in hospitals, based on registered information of outcome. *J Epidemiol Community Health* 1985;39(2):141-7. doi: 10.1136/jech.39.2.141 [published Online First: 1985/06/01]
18. McDonald AD, McDonald JC, Armstrong B, et al. Congenital defects and work in pregnancy. *Br J Ind Med* 1988;45(9):581-8. doi: 10.1136/oem.45.9.581 [published Online First: 1988/09/01]
19. McAbee RR, Gallucci BJ, Checkoway H. Adverse reproductive outcomes and occupational exposures among nurses: an investigation of multiple hazardous exposures. *AAOHN J* 1993;41(3):110-9. [published Online First: 1993/03/01]
20. Lorente C, Cordier S, Bergeret A, et al. Maternal occupational risk factors for oral clefts. Occupational Exposure and Congenital Malformation Working Group. *Scand J Work Environ Health* 2000;26(2):137-45. [published Online First: 2000/05/19]
21. Valanis B, Vollmer W, Labuhn K, et al. Occupational exposure to antineoplastic agents and self-reported infertility among nurses and pharmacists. *J Occup Environ Med* 1997;39(6):574-80. [published Online First: 1997/06/01]
22. Fransman W, Roeleveld N, Peelen S, et al. Nurses with dermal exposure to antineoplastic drugs: reproductive outcomes. *Epidemiology* 2007;18(1):112-9. doi: 10.1097/01.ede.0000246827.44093.c1 [published Online First: 2006/11/14]
23. Connor TH, McDiarmid MA. Preventing occupational exposures to antineoplastic drugs in health care settings. *CA Cancer J Clin* 2006;56(6):354-65. [published Online First: 2006/12/01]
24. Fransman W, Vermeulen R, Kromhout H. Dermal exposure to cyclophosphamide in hospitals during preparation, nursing and cleaning activities. *Int Arch Occup Environ Health* 2005;78(5):403-12. doi: 10.1007/s00420-004-0595-1 [published Online First: 2005/05/12]
25. Barbieri A, Nucci MC, Sabatini L, et al. [Occupational exposure to antineoplastic drugs in a hospital setting: biological and environmental monitoring]. *Epidemiol Prev* 2005;29(5-6 Suppl):87-90. [published Online First: 2006/05/02]
26. Kibby T. A review of surface wipe sampling compared to biologic monitoring for occupational exposure to antineoplastic drugs. *J Occup Environ Hyg* 2017;14(3):159-74. doi: 10.1080/15459624.2016.1237026 [published Online First: 2016/09/28]

- 1  
2  
3 27. Sugiura S, Nakanishi H, Asano M, et al. Multicenter study for environmental and  
4 biological monitoring of occupational exposure to cyclophosphamide in Japan. *J*  
5 *Oncol Pharm Pract* 2011;17(1):20-8. doi: 10.1177/1078155210369851 [published  
6 Online First: 2010/05/18]  
7  
8 28. Sabatini L, Barbieri A, Lodi V, et al. Biological monitoring of occupational exposure to  
9 antineoplastic drugs in hospital settings. *Med Lav* 2012;103(5):394-401. [published  
10 Online First: 2012/10/20]  
11  
12 29. Dhersin A, Atge B, Martinez B, et al. Biomonitoring of occupational exposure to 5-FU by  
13 assaying alpha-fluoro-beta-alanine in urine with a highly sensitive UHPLC-MS/MS  
14 method. *Analyst* 2018;143(17):4110-17. doi: 10.1039/c8an00479j [published Online  
15 First: 2018/07/31]  
16  
17 30. Canal-Raffin M, Khennoufa K, Martinez B, et al. Highly sensitive LC-MS/MS methods for  
18 urinary biological monitoring of occupational exposure to cyclophosphamide,  
19 ifosfamide, and methotrexate antineoplastic drugs and routine application. *J*  
20 *Chromatogr B Analyt Technol Biomed Life Sci* 2016 doi:  
21 10.1016/j.jchromb.2016.10.021 [published Online First: 2016/12/29]  
22  
23  
24  
25  
26  
27  
28  
29  
30  
31  
32  
33  
34  
35  
36  
37  
38  
39  
40  
41  
42  
43  
44  
45  
46  
47  
48  
49  
50  
51  
52  
53  
54  
55  
56  
57  
58  
59  
60

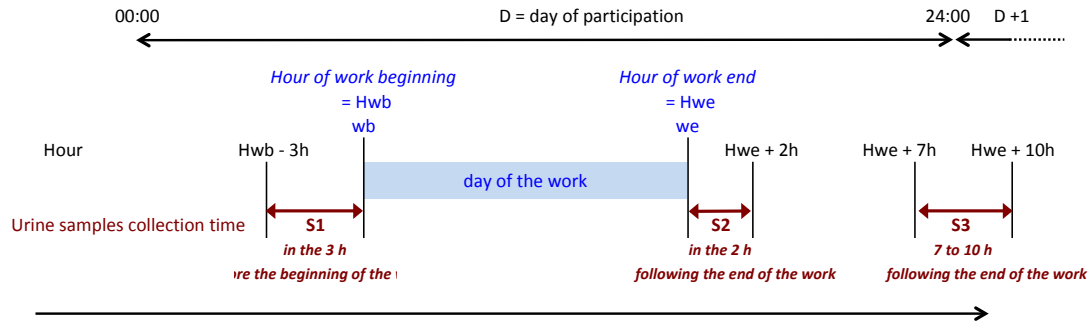

Figure 1: urine samples collection time

For peer review only

Table 1 : general collected data from the self-questionnaire administered to nurses

|                        |                                                                                                                                                                                                                                                                                                                                                                                                                                                                                                                                                                                                                                                                                                                                                                       |
|------------------------|-----------------------------------------------------------------------------------------------------------------------------------------------------------------------------------------------------------------------------------------------------------------------------------------------------------------------------------------------------------------------------------------------------------------------------------------------------------------------------------------------------------------------------------------------------------------------------------------------------------------------------------------------------------------------------------------------------------------------------------------------------------------------|
| Socio-demographic data | <ul style="list-style-type: none"> <li>- sex,</li> <li>- month and year of birth,</li> <li>- pregnancy,</li> <li>- smoking</li> <li>- onychophagia</li> </ul>                                                                                                                                                                                                                                                                                                                                                                                                                                                                                                                                                                                                         |
| Occupational data      | <ul style="list-style-type: none"> <li>- diplomas and specializations : type and years of obtaining,</li> <li>- seniority at the workplace : number of years,</li> <li>- number of years of AD handling and/or taking care patient treating by AD,</li> <li>- current status,</li> <li>- care department,</li> <li>- establishment,</li> <li>- received information on the risks related to AD and years of the information</li> <li>- received awareness on the risk related to AD handling and years of the awareness</li> <li>- level perception on AD exposing tasks, AD handling risks, the individual protective equipments, the action to be taken in AD accidental exposure cases.</li> <li>- data on AD accidental exposures during their career.</li> </ul> |

Table 2 : collected data from the self-questionnaire administered to nurses concerning AD handling the day of inclusion (the day of urine sample collection)

|                                                                                        |                                                                                                                                                                                                                                                                                                                                         |
|----------------------------------------------------------------------------------------|-----------------------------------------------------------------------------------------------------------------------------------------------------------------------------------------------------------------------------------------------------------------------------------------------------------------------------------------|
| Day of AD handling<br>Work schedule the previous 7 days                                | - Day of sample urine collection<br>- Work / no work (detailed for each seven days)                                                                                                                                                                                                                                                     |
| Work shift                                                                             | - Hour of the beginning<br>- Hour of the end                                                                                                                                                                                                                                                                                            |
| Exposure / manipulation to any of the five AD *                                        | Name of AD handling                                                                                                                                                                                                                                                                                                                     |
| Performed tasks (for each task the number of task and AD nature are specified) :       | - AD infusion bags reception,<br>- opening of the package of AD infusion bags,<br>- AD infusion,<br>- possible use of secure administration equipment (Luer-Lock type),<br>- tubing purge,<br>- adjustment of the tubing flow,<br>- tubing disconnection,<br>- unscrewing needle,<br>- deposit of AD waste in bin,<br>- bin evacuation, |
| Total handled amount (in mg)                                                           | Detailed data for each AD                                                                                                                                                                                                                                                                                                               |
| Route of administration for each AD:                                                   | - IV,<br>- IM,<br>- oral,<br>- dermal,<br>- intrathecal.                                                                                                                                                                                                                                                                                |
| Perception of each participant on the department activity                              |                                                                                                                                                                                                                                                                                                                                         |
| Accidental exposure event *. ** (ex: needlestick, reversal or leakage of pockets ...), | - event nature and number of events<br>- AD concerned by this event<br>- associated clinical symptoms<br>- declared event to occupational physician                                                                                                                                                                                     |



Table 3 : collected data from the self-questionnaire administered to nurses concerning take care modalities of AD treated patients the day of inclusion (the day of urine sample collection)

|                                                                                                                                  |                                                                                                                                                                                                                                                                                                                                                                                                                                                                                                                                                                                                                           |
|----------------------------------------------------------------------------------------------------------------------------------|---------------------------------------------------------------------------------------------------------------------------------------------------------------------------------------------------------------------------------------------------------------------------------------------------------------------------------------------------------------------------------------------------------------------------------------------------------------------------------------------------------------------------------------------------------------------------------------------------------------------------|
| Number of treated patients who received an studied AD (number and AD nature) that nurse has taking care the day of participation | <ul style="list-style-type: none"> <li>- patient treatment on the day of participation</li> <li>- patient treatment within the seven days before the day of participation</li> </ul>                                                                                                                                                                                                                                                                                                                                                                                                                                      |
| Performed tasks:                                                                                                                 | <ul style="list-style-type: none"> <li>- direct contact with treated patients (help to wash, handling of treated patient),</li> <li>- handling of treated patient excreta (vomit, urine, faeces, expectoration, soiled sheets),</li> <li>- participation in cleaning chemotherapy treatment room,</li> <li>- cleaning room of treated patient</li> <li>- cleaning sanitary facilities of treated patient</li> <li>- insertion or removal of an urinary catheter</li> <li>- change of drape or bed repair of a treated patient</li> <li>- deposit of treated patient excreta in bin,</li> <li>- bin evacuation,</li> </ul> |

\* data will also be collected for the 7 days prior to the day of study participation

\*\* data will also be collected for all the career

Table 4: collected data from the self-questionnaire administered in nurses concerning personal protective equipment\* (PPE) wearing the day of inclusion

|                                                                                          |                                                                                                                                                                                 |
|------------------------------------------------------------------------------------------|---------------------------------------------------------------------------------------------------------------------------------------------------------------------------------|
| Wearing and type of clothing                                                             | <ul style="list-style-type: none"> <li>- hat</li> <li>- plasticised apron</li> <li>- short sleeve gown</li> <li>- long sleeve gown</li> </ul>                                   |
| Wearing and type of mask                                                                 | <ul style="list-style-type: none"> <li>- surgical mask</li> <li>- FFP2 mask</li> <li>- FFP3 mask</li> </ul>                                                                     |
| Wearing and type of eye protection                                                       | <ul style="list-style-type: none"> <li>- protective eyewear</li> <li>- visor</li> </ul>                                                                                         |
| Wearing and type of gloves                                                               | <ul style="list-style-type: none"> <li>- latex/vinyl/nitrile/PVC</li> <li>- simple pair or double pairs of gloves</li> <li>- short or long sleeve</li> </ul>                    |
| Performed procedure of hand washing after gloves removal (gloves used after AD handling) | <ul style="list-style-type: none"> <li>- nothing</li> <li>- hand sanitizer use</li> <li>- wash of hands with water only</li> <li>- wash of hands with water and soap</li> </ul> |

\* PPE list proposed to each nurse for each performed task

\*\* for each item the use frequency is ask (never, sometimes, systematically)

# BMJ Open

## A study protocol for the assessment of nurses internal contamination by antineoplastic drugs in hospital centres: a cross sectional multicentre descriptive study

|                                 |                                                                                                                                                                                                                                                                                                                                                                                                                                                                                                                                                                                                                                                                                                                                                                                                                                                                                                                                                                                                                                                                                                                                              |
|---------------------------------|----------------------------------------------------------------------------------------------------------------------------------------------------------------------------------------------------------------------------------------------------------------------------------------------------------------------------------------------------------------------------------------------------------------------------------------------------------------------------------------------------------------------------------------------------------------------------------------------------------------------------------------------------------------------------------------------------------------------------------------------------------------------------------------------------------------------------------------------------------------------------------------------------------------------------------------------------------------------------------------------------------------------------------------------------------------------------------------------------------------------------------------------|
| Journal:                        | <i>BMJ Open</i>                                                                                                                                                                                                                                                                                                                                                                                                                                                                                                                                                                                                                                                                                                                                                                                                                                                                                                                                                                                                                                                                                                                              |
| Manuscript ID                   | bmjopen-2019-033040.R1                                                                                                                                                                                                                                                                                                                                                                                                                                                                                                                                                                                                                                                                                                                                                                                                                                                                                                                                                                                                                                                                                                                       |
| Article Type:                   | Protocol                                                                                                                                                                                                                                                                                                                                                                                                                                                                                                                                                                                                                                                                                                                                                                                                                                                                                                                                                                                                                                                                                                                                     |
| Date Submitted by the Author:   | 18-Sep-2019                                                                                                                                                                                                                                                                                                                                                                                                                                                                                                                                                                                                                                                                                                                                                                                                                                                                                                                                                                                                                                                                                                                                  |
| Complete List of Authors:       | Villa, Antoine; Université de Bordeaux, Inserm U1219, EPICENE; AP-HM, Consultation de pathologie professionnelle et de l'environnement<br>Molimard, Mathieu; Université de Bordeaux, Bordeaux PharmacoEpi (BPE, CIC 1401) ; CHU de Bordeaux, Laboratoire de Pharmacologie Clinique et Toxicologie<br>Bignon, Emmanuelle; Université de Bordeaux, Bordeaux PharmacoEpi (BPE, CIC 1401)<br>Martinez, Béatrice; Université de Bordeaux, Inserm U1219, EPICENE<br>Rouyer, Magali; Université de Bordeaux, Bordeaux PharmacoEpi (BPE, CIC 1401)<br>Mathoulin-Pelissier, Simone; Université de Bordeaux, Inserm U1219, EPICENE<br>Baldi, Isabelle; Université de Bordeaux, Inserm U1219 - EPICENE team; CHU de Bordeaux, GH Pellegrin, Pôle de Santé Publique, Service de Médecine du Travail et Pathologies professionnelles<br>Verdun-Esquer, Catherine; Centre Hospitalier Universitaire de Bordeaux, GH Pellegrin, Service de médecine du travail et de pathologies professionnelles<br>Canal Raffin, Mireille; Université de Bordeaux, Inserm U1219, EPICENE; CHU Bordeaux GH Pellegrin, Laboratoire de Pharmacologie Clinique et Toxicologie |
| <b>Primary Subject Heading</b>: | Occupational and environmental medicine                                                                                                                                                                                                                                                                                                                                                                                                                                                                                                                                                                                                                                                                                                                                                                                                                                                                                                                                                                                                                                                                                                      |
| Secondary Subject Heading:      | Nursing                                                                                                                                                                                                                                                                                                                                                                                                                                                                                                                                                                                                                                                                                                                                                                                                                                                                                                                                                                                                                                                                                                                                      |
| Keywords:                       | OCCUPATIONAL & INDUSTRIAL MEDICINE, Antineoplastic drugs, Urine, Occupational exposure, Biomonitoring, Nurses                                                                                                                                                                                                                                                                                                                                                                                                                                                                                                                                                                                                                                                                                                                                                                                                                                                                                                                                                                                                                                |
|                                 |                                                                                                                                                                                                                                                                                                                                                                                                                                                                                                                                                                                                                                                                                                                                                                                                                                                                                                                                                                                                                                                                                                                                              |

SCHOLARONE™  
Manuscripts

1  
2  
3  
4 A study protocol for the assessment of nurses internal contamination by antineoplastic  
5 drugs in hospital centres: a cross sectional multicentre descriptive study  
6  
7  
8

9 Antoine Villa<sup>1,2</sup>, Mathieu Molimard<sup>1,3,4</sup>, Emmanuelle Bignon<sup>5</sup>, Béatrice Martinez<sup>1,4</sup>, Magali  
10 Rouyer<sup>5</sup>, Simone Mathoulin-Pelissier<sup>1,4</sup>, Isabelle Baldi<sup>1,4,6</sup>, Catherine Verdun-Esquer<sup>6</sup>, Mireille  
11 Canal-Raffin <sup>\*,1,3,4</sup>  
12  
13

14 <sup>1</sup> INSERM U1219, Université de Bordeaux, 33076 Bordeaux, France.

15 <sup>2</sup> Consultation de Pathologie Professionnelle, Hôpital Timone, 13005 Marseille, France

16 <sup>3</sup> Laboratoire de Pharmacologie Clinique et Toxicologie, CHU de Bordeaux, 33076 Bordeaux,  
17 France.

18 <sup>4</sup> University of Bordeaux, 33076 Bordeaux, France.

19 <sup>5</sup> Bordeaux PharmacoEpi (BPE, CIC 1401), Université de Bordeaux, 33076 Bordeaux, France

20 <sup>6</sup> Service de Médecine du Travail et de Pathologies Professionnelles, CHU de Bordeaux,  
21 33076 Bordeaux, France.  
22  
23  
24  
25  
26  
27

28 \*Corresponding author: Mireille Canal-Raffin

29 Equipe Epidémiologie des Cancers, Environnement et Exposition

30 INSERM U1219, Bordeaux Population Health

31 Université de Bordeaux

32 Bât 1A, Carreire, Zone Nord, case 36

33 33076 Bordeaux cedex, France.

34 Tel: +33 (0)5 57 57 15 60 Fax: +33 (0)5 57 57 46 71

35 E-mail: mireille.canal-raffin@u-bordeaux.fr  
36  
37  
38  
39  
40  
41  
42  
43  
44  
45  
46  
47  
48  
49  
50  
51  
52  
53  
54  
55  
56  
57  
58  
59  
60

## Abstract

**Introduction:** Antineoplastic drugs (AD) are potentially carcinogenic and/or reprotoxic molecules. Healthcare professionals are increasingly exposed to these drugs and can be potentially contaminated by them. Internal contamination of professionals is a key concern for occupational physicians in the assessment and management of occupational risks in healthcare settings. Objectives of this study are to report AD internal contamination rate in nursing staff and to identify factors associated with internal contamination.

**Methods and analysis:** this trial will be conducted in two French hospital centres: University Hospital of Bordeaux and IUCT-Oncopole of Toulouse. The target population is nurses practicing in one of the fifteen selected care departments where at least one of the five studied AD is handled (5-fluorouracil, cyclophosphamide, doxorubicin, ifosfamide, methotrexate). The trial will be conducted with the following steps: (1) development of analytical methods to quantify AD urine biomarkers, (2) study of the workplace and organization around AD in each care department (transport and handling, professional practices, personal and collective protection equipments available) (3) development of a self-questionnaire detailing professional activities during the day of inclusion, (4) nurses inclusion (urine samples and self-questionnaire collection), (5) urine assays, (6) data analysis.

**Ethics and dissemination:** The study protocol has been approved by the French Advisory Committee on the Treatment of Information in Health Research (CCTIRS) and by the French Data Protection Authority (CNIL). Following the opinion of the Regional Committee for the Protection of Persons, this study is outside the scope of the provisions governing biomedical research and routine care (n°2014/87). The results will be submitted to peer-reviewed journals and reported at suitable national and international meetings.

**Trial registration number:** NCT03137641, April 28, 2017

**Strengths and limitations of this study:**

- For reliable detection and to reduce the number of misclassifications as uncontaminated, the analytical methods used will to be specific, highly sensitive, will use isotopic internal standard to normalise urine matrix effect and the AD urine stability during storage will be studied.
- Exposure biomarkers of five antineoplastic drugs will be analysed in each urine sample and AD concentration will be expressed in ng/L and in ng/g of urinary creatinine to account for urine dilution.
- The care departments of the study are selected among different medical specialties.
- The data from the self-questionnaires coupled with the results of the urine assays will serve to identify factors associated with internal contamination.
- This study will only assess the internal contamination of nurses and the environmental contamination of working surface will be performed separately in an other study.

### Introduction:

The number of cancer cases is constantly increasing worldwide and consequently, the administration of antineoplastic drugs (AD) is more and more widespread. In France, more than 320,000 people were treated with AD in 2015.<sup>1</sup> This leads to an increase in the use of these products by health professionals in terms of frequency and quantities handled and therefore to an increase in occupational exposure to these substances. According to the Sumer survey conducted with occupational physicians in 2010, more than 49,400 employees were potentially exposed to these drugs in France<sup>2</sup> and more than 5.5 million employees in the United States in 2003.<sup>3</sup> Several professions are concerned by this exposure, including pharmacist technicians, pharmacists, couriers, nurses, assistant nurses, hospital agents, doctors, etc.

More than one hundred AD are currently marketed.<sup>4</sup> Most are on the list of "dangerous to handle" medicines issued by the US National Institute for Occupational Research and Safety (NIOSH) in 2004<sup>3</sup> because of their carcinogenic, mutagenic and/or reprotoxic effects (CMR). Thirty-eight AD have been evaluated by IARC: 13 are classified as a human carcinogens (group 1), 11 as probably carcinogen (group 2A), 7 may be carcinogenic (group 2B), and 7 are not classifiable for human carcinogenicity (group 3).

Since the 1970s, epidemiological studies conducted with nurses handling AD have shown an increase in risk of cancers<sup>5 6</sup> such as leukemias<sup>5</sup> and/or reprotoxic effects. The reported reprotoxic effects are: spontaneous abortions,<sup>7-13</sup> fetal malformations,<sup>6 14-17</sup> decreased fertility,<sup>13 18 19</sup> risk of uterine growth retardation and prematurity.<sup>19</sup>

Several international studies conducted between the 1980s and 2003 report that pharmacist assistants and nurses handling these drugs were contaminated, with rates exceeding 75% or even 90% of staff in some studies.<sup>20-22</sup> Moreover, numerous studies show surface contamination of workplace.<sup>23</sup>

Surface sampling is a useful tool in order to identify sources of environmental contamination, to help in the implementation of corrective measures, to verify the effectiveness of the surface decontamination process and to insure a monitoring of these surfaces. Surface sampling are complementary to biomonitoring which is the best approach to measure internal contamination, *i.e.* AD detection in urines of exposed healthcare professionals. Indeed, unlike metrology of surface contamination, biomonitoring allows to take into account at the level of each individual, all exposure pathways (respiratory, dermal, oral), the wearing or not of the protective equipment, the effectiveness of the type of protective equipment, gestures and professional practices, personal hygiene and quantities handled. Several analytical methods have been published for surface metrology of AD<sup>24-28</sup> and for AD urine biomonitoring.<sup>29-32</sup> More than 17 AD or their urine metabolites can be detected with these methods. Detection limit value in urine, for six of them, is from 0.01ng/L<sup>32-34</sup> to 0.02ng/L.<sup>35</sup> For the others, the LOD value in urine is from 0.05 to 1ng/L.<sup>36</sup>

In the absence of reference biological value for occupational AD exposure, the long-term effects of occupational low-intensity exposure to these CMR products should lead to a reduction in exposures to the lowest possible level.

During occupational exposure, the contamination can take place by the respiratory and/or cutaneous and/or oral route.<sup>23</sup> It can occur directly during the reception, preparation, transport, injection of the drug and the handling of waste or indirectly through the patients and their excreta (vomit, urine, stool, sweat), sheets and soiled linen.<sup>23 37</sup> In order to limit

1  
2  
3 these exposures and to guarantee the safety of employees, centralized reconstitution units  
4 for chemotherapies have been created in healthcare establishments and recommendations  
5 have been drawn up by government agencies and other occupational health organizations.<sup>3</sup>  
6<sup>38</sup> Despite the recommendations and the improvements made in terms of safety on the  
7 handling and transport of these drugs, several recent studies show that the problem of  
8 contamination is still relevant, both in the working environment<sup>23 39-43</sup> and for the  
9 professionals themselves.<sup>33 35 39 44-46 47-51</sup> Currently, scientific reviews report that there is no  
10 significant correlation between AD surface monitoring and AD urine monitoring.<sup>40</sup> In this  
11 context, there is no disadvantage in conducting both studies separately.

12  
13 Above reported internal contamination, data show that preventive measures are not  
14 currently sufficiently controlled, confirmed by Graeve et al.<sup>52</sup> It is thus necessary to  
15 understand the determinants of exposure.

16  
17 Very little current data are available on the internal contamination of French healthcare  
18 professionals exposed to AD. The CACIES protocol detailed in this paper, aims to collect data  
19 on AD internal contamination in nurses and understand factors associated with this  
20 contamination.  
21  
22

### 23 **Objectives:**

24  
25 The main objective of the CACIES protocol is to evaluate the rate of internal contamination  
26 by AD in nurses administering AD and/or taking care of patients treated with these  
27 molecules, in two French hospitals. This rate will be described globally and then stratified by  
28 care department.  
29

30 The secondary objectives are: (I) to describe for each studied AD the rate of internal  
31 contamination among the nurses in the study, and the concentrations associated with this  
32 contamination; (II) to identify factors associated with internal contamination in this study  
33 (exposure characteristics and use of protective equipments by nurses).  
34  
35

### 36 **Methods and analysis:**

37  
38 CACIES is a cross-sectional, descriptive, prospective multicentre study conducted in two  
39 French hospitals (University Hospital of Bordeaux and IUCT- Oncopole of Toulouse).

40 Eleven hospitals care departments, having an activity in the management of cancer patients  
41 treated with any of the following AD: cyclophosphamide, ifosfamide, methotrexate, 5-  
42 fluorouracil and/or doxorubicin, were chosen for this study.

43 The target population is nurses occupationally exposed to the studied AD.  
44  
45

### 46 **Eligibility criteria**

47  
48 The three following inclusion criteria are required: (1) be a nurse practising in one of the  
49 selected care departments where at least one of the five studied AD is handled; (2) handle at  
50 least one of the five studied AD and/or take care of a patient treated with one of the five  
51 studied AD on the day of study participation (i.e day of urine samples collection); (3) agree to  
52 participate in the study and sign the participation consent form.

53  
54 Some work tasks (table 1) expose workers more than others (table 2) in term of level of AD  
55 concentration (AD preparation, patient's urine, washing water after the patient had been  
56 washed and cleaning water after a patient toilet had been cleaned, ...).<sup>37</sup> However, the  
57 industrial sanitary rules (smoking, washing hands, onychophagia...) and the wearing of PPE  
58 according to the tasks are not always respected. As a result, some less exposing tasks may  
59 cause higher workers contamination level than more exposing tasks. Indeed, Fransman et  
60



al,<sup>37</sup> highlight levels of external hand contamination higher for tasks such as washing treated patients, removing bed sheets and handling urine of treated patients compared to drug preparation and toilet cleaning tasks. Therefore for the second inclusion criteria, all nurses will be included whatever the task done (AD handling and/or take care of AD treated patient) during the day of the participation to the study participation.

Table 1 : collected data from the self-questionnaire administered to nurses concerning AD handling the day of inclusion (the day of urine sample collection)

|                                                                                        |                                                                                                                                                                                                                                                                                                             |
|----------------------------------------------------------------------------------------|-------------------------------------------------------------------------------------------------------------------------------------------------------------------------------------------------------------------------------------------------------------------------------------------------------------|
| Day of AD handling<br>Work schedule the previous 7 days                                | - Day of sample urine collection<br>- Work*/ no work (detailed for each seven days)                                                                                                                                                                                                                         |
| Work shift                                                                             | - Hour of the beginning<br>- Hour of the end                                                                                                                                                                                                                                                                |
| Exposure / manipulation to any of the five AD *                                        | Name of AD handling                                                                                                                                                                                                                                                                                         |
| Performed tasks (for each task the number of task and AD nature are specified) :       | - AD infusion bags reception,<br>- opening of the package of AD infusion bags,<br>- AD infusion,<br>- use of closed system transfer device,<br>- tubing purge,<br>- adjustment of the tubing flow,<br>- tubing disconnection,<br>- unscrewing needle,<br>- deposit of AD waste in bin,<br>- bin evacuation, |
| Total handled amount (in mg)                                                           | Detailed data for each AD                                                                                                                                                                                                                                                                                   |
| Route of administration for each AD:                                                   | - IV,<br>- IM,<br>- oral,<br>- dermal,<br>- intrathecal.                                                                                                                                                                                                                                                    |
| Perception of each participant on the department activity                              |                                                                                                                                                                                                                                                                                                             |
| Accidental exposure event *. ** (ex: needlestick, reversal or leakage of pockets ...), | - event nature and number of events<br>- AD concerned by this event<br>- associated clinical symptoms<br>- declared event to occupational physician                                                                                                                                                         |

\* data will also be collected for the 7 days prior to the day of study participation

\*\* data will also be collected for all the career

Table 2 : collected data from the self-questionnaire administered to nurses concerning take care modalities of AD treated patients the day of inclusion (the day of urine sample collection)

|                                                                                                                                  |                                                                                                                                                                                                                                                                                                                                                                                                                                                                                                                                                                                                                           |
|----------------------------------------------------------------------------------------------------------------------------------|---------------------------------------------------------------------------------------------------------------------------------------------------------------------------------------------------------------------------------------------------------------------------------------------------------------------------------------------------------------------------------------------------------------------------------------------------------------------------------------------------------------------------------------------------------------------------------------------------------------------------|
| Number of treated patients who received an studied AD (number and AD nature) that nurse has taking care the day of participation | <ul style="list-style-type: none"> <li>- patient treatment on the day of participation</li> <li>- patient treatment within the seven days before the day of participation</li> </ul>                                                                                                                                                                                                                                                                                                                                                                                                                                      |
| Performed tasks:                                                                                                                 | <ul style="list-style-type: none"> <li>- direct contact with treated patients (help to wash, handling of treated patient),</li> <li>- handling of treated patient excreta (vomit, urine, faeces, expectoration, soiled sheets),</li> <li>- participation in cleaning chemotherapy treatment room,</li> <li>- cleaning room of treated patient</li> <li>- cleaning sanitary facilities of treated patient</li> <li>- insertion or removal of an urinary catheter</li> <li>- change of drape or bed repair of a treated patient</li> <li>- deposit of treated patient excreta in bin,</li> <li>- bin evacuation,</li> </ul> |

The exclusion criteria are: (1) be a student nurse; (2) be treated with one of the five studied AD or have been treated with any in the year prior to the day of study participation; (3) have at home a person treated with one of the five studied AD, in the month before the day of study participation.

### Study design

The study will be conducted in six steps.

Step 1: Development of analytical methods for quantification of AD urine biomarkers

Analytical methods will be developed in the Pharmacology and Toxicology Laboratory of the Bordeaux University Hospital in accordance to the EMEA guideline.<sup>53</sup> These methods use an ultra-high-performance liquid chromatography system coupled with tandem mass spectrometry (UHPLC-MS/MS) characterized by high sensitivity and high specificity (5500 QTrap, Sciex®). AD urine biomarkers will be the AD themselves with the exception of 5-fluorouracil, which is not detectable in urine. For this molecule, its urinary metabolite, alfa-fluoro-beta-alanine (FBAL), will be assayed to assess internal contamination. Two methods have been already validated<sup>33</sup> but the limit of quantification (LOQ) will be improved. Two other methods are developed for this study for the determination of 5-fluorouracil metabolite (FBAL)<sup>35</sup> and doxorubicin urine biomarkers. These methods will be robust and highly sensitive with LOQ adapted to this type of study: i.e. very low LOQ values allowing detection of urine AD traces of the order of ng/L.

For each AD, isotopic internal standard is added in each urine sample to normalize urine matrix effect. Stability of each AD in urine sample is studied under different conditions of storage (+20°C for 24h with and without light, at +4°C for 72h, at -20°C for one month and one year, and after three freeze-thaw cycles in urine). A post-preparative stability was conducted by analysing extracted urine samples kept under auto-sampler conditions (+15°C) for 72h.

### Step 2: Study of the workplace and organization around AD in each care department

A hygienist of the Occupational Medicine department will observe the activities around AD in each selected care department at the end of the urine sample and self-questionnaire collection. Collective and individual protection equipment available in each department as well as the professional practices observed will be reported in this study of the workplace. A description of the complete organization around AD and excreta of treated patients within each care department will also be carried out: AD reception in the department, administration to patients, disposal of waste. All these observations will be collected and reported in a standardized way for each care department.

### Step 3: Development of a self-questionnaire

A self-questionnaire is built, in the light of literature data, concerning work tasks potentially exposing, risk perception.<sup>49 50 54-58</sup> In addition, we conducted a pilot study in a healthcare unit that enabled us to carry out a study of the complete organization around AD and excreta of treated patients and to collect tasks performed, type and wearing of PPE. During this pilot study, a draft version was pre-tested on a small group of nurses. When it was necessary, questions were changed according to the feedback of the nurses. A final version was elaborated and will be used in the CACIES study.

The aim of this self-questionnaire is to collect several data: socio-demographic and occupational data (table 3), data concerning AD handling on the day of inclusion (table 1), data concerning take care modalities of AD treated patient (table 2), and personal protective equipment (PPE) worn the day of inclusion (table 4).

For each task listed in tables 1 and 2, the influence of the questionnaire on the nurse practices on the day of participation and for the future is asked. For each task listed in tables 1 and 2, personal protective equipments (table 4) that the nurse wears the day of inclusion are asked. For each task the PPE list is exhaustive so as not to influence the nurse in the choice of PPE according to the task.

*Table 3 : general collected data from the self-questionnaire administered to nurses*

|                        |                                                                                                                                                                                                                                                                                                                                                                                                                                                                                                                                                                                                         |
|------------------------|---------------------------------------------------------------------------------------------------------------------------------------------------------------------------------------------------------------------------------------------------------------------------------------------------------------------------------------------------------------------------------------------------------------------------------------------------------------------------------------------------------------------------------------------------------------------------------------------------------|
| Socio-demographic data | <ul style="list-style-type: none"> <li>- sex,</li> <li>- month and year of birth,</li> <li>- pregnancy,</li> <li>- smoking</li> <li>- onychophagia</li> </ul>                                                                                                                                                                                                                                                                                                                                                                                                                                           |
| Occupational data      | <ul style="list-style-type: none"> <li>- diplomas and specializations : type and years of obtaining,</li> <li>- seniority at the workplace : number of years,</li> <li>- number of years of AD handling and/or taking care patient treating by AD,</li> <li>- current status,</li> <li>- care department,</li> <li>- establishment,</li> <li>- received information on the risks related to AD and years of the information</li> <li>- received awareness on the risk related to AD handling and years of the awareness</li> <li>- level perception on AD exposing tasks, AD handling risks,</li> </ul> |

|  |                                                                                                                                                                    |
|--|--------------------------------------------------------------------------------------------------------------------------------------------------------------------|
|  | <p>the individual protective equipments, the action to be taken in AD accidental exposure cases.</p> <p>- data on AD accidental exposures during their career.</p> |
|--|--------------------------------------------------------------------------------------------------------------------------------------------------------------------|

Table 4: collected data from the self-questionnaire administered in nurses concerning personal protective equipment\* (PPE) wearing the day of inclusion\*\*

|                                                                                          |                                                                                                                                                                                 |
|------------------------------------------------------------------------------------------|---------------------------------------------------------------------------------------------------------------------------------------------------------------------------------|
| Wearing and type of clothing                                                             | <ul style="list-style-type: none"> <li>- hat</li> <li>- plasticised apron</li> <li>- short sleeve gown</li> <li>- long sleeve gown</li> </ul>                                   |
| Wearing and type of mask                                                                 | <ul style="list-style-type: none"> <li>- surgical mask</li> <li>- FFP2 mask</li> <li>- FFP3 mask</li> </ul>                                                                     |
| Wearing and type of eye protection                                                       | <ul style="list-style-type: none"> <li>- protective eyewear</li> <li>- visor</li> </ul>                                                                                         |
| Wearing and type of gloves                                                               | <ul style="list-style-type: none"> <li>- latex/vinyl/nitrile/PVC</li> <li>- simple pair or double pairs of gloves</li> <li>- short or long sleeve</li> </ul>                    |
| Performed procedure of hand washing after gloves removal (gloves used after AD handling) | <ul style="list-style-type: none"> <li>- nothing</li> <li>- hand sanitizer use</li> <li>- wash of hands with water only</li> <li>- wash of hands with water and soap</li> </ul> |

\* PPE list proposed to each nurse for each performed task

\*\* for each item the use frequency is ask (never, sometimes, systematically)

#### Step 4: Nurses inclusion

Each nurse from the selected healthcare departments will receive a briefing note prior to inclusion and will be invited to participate in an information meeting about CACIES study. At the end of the meeting, a kit containing the polypropylene pots to collect urine samples, the self-questionnaire and the participation consent form will be given to each volunteer. During the meeting, the nurse will be asked to collect their urine samples after several days of work. Therefore, the self-questionnaire plans to collect data on work history the previous seven days before urine samples collection (type of studied AD handling, accidental exposure event). For each nurse, the study participation lasts 24 hours.

Three urine samples will be collected at different times in less than 24 hours (Figure 1): the first one within the 3 hours before the start of the work to document an internal contamination following exposure the previous days before the study; the second within 2 hours following the end of the work, to document an internal contamination following exposure during the first hours of the day working day; the third between 7 to 10 hours after the end of the work, to document an internal contamination following exposure at the end of the work. The time of the 3rd sampling was chosen to take into account a delayed absorption by the cutaneous way as indicated by Hirst et al.<sup>59</sup>

1  
2  
3 A document gathering the date and times of urine samples will be attached to the samples.  
4 Urine samples will be sent to the pharmacology and toxicology laboratory of Bordeaux  
5 university hospital within 72h at +4°C. Then samples will be aliquoted and stored at -20°C  
6 until analysis. At the same time, nurses will complete a self-questionnaire concerning their  
7 professional activity throughout the AD handling day. The self-questionnaire is a paper  
8 document with a detachable flap. This part will be sent by mail (return postage paid  
9 envelopes) to the Coordinating Centre, which will monitor the completed data and the other  
10 part will be kept by the nurse. After urine sample reception by the lab, the latter will  
11 immediately informs the Coordinating Centre of this reception. The coordinating centre will  
12 contact the nurses within 7 days if the self-questionnaire has not been received yet, limiting  
13 possible loss of data. Moreover, in case of missing or discordant data, each subject will be  
14 contacted by a member of the coordinating center to complete the self-questionnaire.  
15  
16  
17  
18

#### 19 Step 5: Urine assays

20 For each urine sample, four extraction methods followed by a validated analytical method  
21 will be performed. Moreover, urine creatinine will be analysed for each urine sample to  
22 account for dilution.<sup>60 61</sup> The result will be expressed according to the AD concentration level  
23 (ng/L and ng/g of urinary creatinine). Participant will be considered as contaminated when  
24 at least one of the five studied AD, is detected in at least one of the three collected urine  
25 samples.  
26  
27  
28

#### 29 Step 6: Data analysis

30 Statistical analysis will be performed using SAS® software (SAS Institute, v9.3, North  
31 Carolina, USA) by a statistician from the Coordinating Centre.

32 The rate of internal contamination will be calculated by reporting the number of  
33 contaminated subjects by at least one of the studied AD to the total number of subjects  
34 included and will be expressed as a percentage. This proportion will be estimated globally  
35 then detailed by molecule and department. The extent of the concentration levels achieved  
36 will also be described for each sampling time and each drug.

37 The statistical analysis will include a global descriptive analysis of collected data from the  
38 self-administered questionnaire. Then factors associated with internal contamination of  
39 nurses will be studied using a multivariate logistic regression model. An univariate analysis  
40 will be used to select the variables which will be included into the multivariate model at the  
41 significance level of 25%. A step-by-step method will be used to select the significant  
42 variables at the 5% threshold in the final multivariate model. Interactions and confounders  
43 will be sought and tested throughout the modeling.  
44  
45  
46  
47

#### 48 **Endpoints:**

49 The primary endpoint will be the absence or presence of internal AD contamination for each  
50 nurse. It will be determined in the light of AD urine assays results. A subject will be  
51 considered contaminated if at least one of the five AD is detected in at least one of the three  
52 urine samples.  
53

54 Others endpoints will be studied:

- 55 - AD internal contamination stratified by drug and by sampling times (S1, S2, S3).
- 56 - Descriptions of the studied population from the self-questionnaire data: (I) socio-
- 57 demographic data; (II) occupational data; (III) AD handling data (IV) take care modalities of
- 58
- 59
- 60

1  
2  
3 treated patients by studied AD. This description will be stratified by centre and by  
4 department (stratification conditioned by the number of participants)  
5 Following these descriptions, the factors, described above, associated with internal  
6 contamination of nurses will be studied.  
7  
8

### 9 **Calculation of the number of participants:**

10 The main objective is to estimate the rate of nurse internal AD contamination in two  
11 hospitals. Thus, no sample size calculation will be made for the main criterion since it will be  
12 estimated from the total eligible population. Given the total number of nurses working in  
13 the 11 selected care departments to participate in the study, 300 nurses are potentially  
14 eligible.  
15

16 Since this protocol is not very constraining for participants, with only one day of inclusion  
17 and only three noninvasive urinary samples, we expect a participation rate around 75% for  
18 the nursing staff. With this participation rate, the number of recruited subjects expected for  
19 this study will be about 225 subjects.  
20  
21

### 22 **Impact of the study:**

23 The impact of this study will be: (1) the assessment of the rate of nurses internal  
24 contamination in care departments, (2) awareness of nurses about their contamination, (3)  
25 implementation of corrective actions, (4) improvement of AD handling and transport safety,  
26 (5) improvement of nurse professional practices and particularly the use of protection  
27 equipment, (6) powerful (highly sensitive) analytical tools set up in the laboratory, adapted  
28 to the follow-up of professionals exposed to "dangerous handling drugs", and available for  
29 occupational physicians.  
30  
31

### 32 **Patient and public involvement:**

33 The research question and the protocol have been developed by a multidisciplinary team  
34 and an analysis of the workplace. As indicated in step 3 of the study protocol, a pilot study  
35 was previously conducted, in a healthcare unit of Bordeaux university hospital during which  
36 a draft version of a self-questionnaire was developed and pre-tested on a small group of  
37 nurses and modify according to their feedback.  
38

39 Representative workers of hospital personnel, managers of the two hospitals, health  
40 managers will be informed of the study. Each nurse from the selected care departments will  
41 receive a briefing note prior to inclusion and will be invited to participate in an information  
42 meeting about CACIES study.  
43  
44

### 45 **Ethics and dissemination:**

46 The study protocol has been approved by the French Advisory Committee on the Treatment  
47 of Information in Health Research (CCTIRS) and by the French Data Protection Authority  
48 (CNIL).  
49

50 Collected data will be subject to a computerized treatment in the Coordinating Centre of this  
51 study (Research Platform in Pharmacoepidemiology, BPE, CIC Bordeaux CIC1401) in  
52 compliance with law n° 78-17 (January 6, 1978) relating to data processing, files and  
53 freedoms modified by the French law 2004-801 (August 6, 2004). Collected data will be kept  
54 during five years.  
55

56 The results from this study will be submitted to peer-reviewed journals and reported at  
57 suitable national and international conferences or workshops.  
58  
59  
60



### Author affiliations

<sup>1</sup> INSERM U1219, Université de Bordeaux, 33076 Bordeaux, France.

<sup>2</sup> Consultation de Pathologie Professionnelle, Hôpital Timone, 13005 Marseille, France

<sup>3</sup> Laboratoire de Pharmacologie Clinique et Toxicologie, CHU de Bordeaux, 33076 Bordeaux, France.

<sup>4</sup> University of Bordeaux, 33076 Bordeaux, France.

<sup>5</sup> Bordeaux PharmacoEpi (BPE, CIC 1401), Université de Bordeaux, 33076 Bordeaux, France

<sup>6</sup> Service de Médecine du Travail et de Pathologies Professionnelles, CHU de Bordeaux, 33076 Bordeaux, France.

### Contributors

MCR, MM designed the initial study concept,

CVE, AV, IB, SMP, BM, contributed to the design of the study and development of the protocol,

MCR, CVE, EB, AV, MR, participate to develop the self-questionnaire,

AV, MCR wrote the manuscript with the contributions of others authors for each work packages.

All authors have taken part in the academic discussions of the manuscript's content, and in revising the article.

All authors read and approved the final manuscript.

We apologized Pr Nicholas Moore for his proofreading.

### Funding

This work represents independent research. It is supported by a grant from the French Ministry of Health (grant reference number [PHRC-I n°13-077]).

### Competing interests

The authors declare that they have no competing interests.

### Patient consent for publication

Not required

### Ethics approval

Following the opinion of the French Regional Ethic Committee for the Protection of Persons (CPP n° 2014/87), this study is considered as outside the scope of the provisions governing biomedical research and routine care. Indeed, CACIES is an observational study which does not modify working methods and/or the use of protective equipment. The study protocol has been approved by the French Advisory Committee on the Treatment of Information in Health Research (CCTIRS) and by the French Data Protection Authority (CNIL).

This study is registered on the ClinicalTrials.gov website, under the number NCT03137641.

### Provenance and peer review

Not commissioned; externally peer-reviewed.

### References.

1. Anonymous. [Healthcare]: French National Cancer Institute; 2019 [Available from: <http://lesdonnees.e-cancer.fr/Themes/Soins> accessed 12 July 2019].
2. Amira S. [Occupational risks by profession. 2010 Sumer study]. SynthèseStat' Direction de l'animation de la recherche, des études et des statistiques (DARES), 2014:1-221.
3. Anonymous. NIOSH ALERT : Preventing Occupational Exposures to Antineoplastic and Other Hazardous Drugs in Health Care Settings (Publication n°2004-165): Centers for Disease Control and Prevention - National Institute for Occupational Safety and Health, 2004:58.
4. Anonymous. NIOSH List of Antineoplastic and Other Hazardous Drugs in Healthcare Settings (Publication No. 2016–161): Department of health and human services. Centers for Disease Control and Prevention. National Institute for Occupational Safety and Health, 2016:42.
5. Skov T, Maarup B, Olsen J, et al. Leukaemia and reproductive outcome among nurses handling antineoplastic drugs. *Br J Ind Med* 1992;49(12):855-61. doi: 10.1136/oem.49.12.855 [published Online First: 1992/12/01]
6. Ratner PA, Spinelli JJ, Beking K, et al. Cancer incidence and adverse pregnancy outcome in registered nurses potentially exposed to antineoplastic drugs. *BMC Nurs* 2010;9:15. doi: 10.1186/1472-6955-9-15 [published Online First: 2010/09/18]
7. Selevan SG, Lindbohm ML, Hornung RW, et al. A study of occupational exposure to antineoplastic drugs and fetal loss in nurses. *N Engl J Med* 1985;313(19):1173-8. doi: 10.1056/NEJM198511073131901 [published Online First: 1985/11/07]
8. Rogers B, Emmett EA. Handling antineoplastic agents: urine mutagenicity in nurses. *Image J Nurs Sch* 1987;19(3):108-13. [published Online First: 1987/01/01]
9. Stucker I, Caillard JF, Collin R, et al. Risk of spontaneous abortion among nurses handling antineoplastic drugs. *Scand J Work Environ Health* 1990;16(2):102-7. [published Online First: 1990/04/01]
10. Valanis B, Vollmer WM, Steele P. Occupational exposure to antineoplastic agents: self-reported miscarriages and stillbirths among nurses and pharmacists. *J Occup Environ Med* 1999;41(8):632-8. [published Online First: 1999/08/24]
11. Lawson CC, Rocheleau CM, Whelan EA, et al. Occupational exposures among nurses and risk of spontaneous abortion. *Am J Obstet Gynecol* 2012;206(4):327 e1-8. doi: 10.1016/j.ajog.2011.12.030 [published Online First: 2012/02/07]
12. Dranitsaris G, Johnston M, Poirier S, et al. Are health care providers who work with cancer drugs at an increased risk for toxic events? A systematic review and meta-analysis of the literature. *J Oncol Pharm Pract* 2005;11(2):69-78. doi: 10.1191/1078155205jp155oa [published Online First: 2006/02/10]
13. Zhang X, Zheng Q, Lv Y, et al. Evaluation of adverse health risks associated with antineoplastic drug exposure in nurses at two Chinese hospitals: The effects of implementing a pharmacy intravenous admixture service. *Am J Ind Med* 2016;59(4):264-73. doi: 10.1002/ajim.22553 [published Online First: 2016/02/24]
14. Hemminki K, Kyyronen P, Lindbohm ML. Spontaneous abortions and malformations in the offspring of nurses exposed to anaesthetic gases, cytostatic drugs, and other potential hazards in hospitals, based on registered information of outcome. *J Epidemiol Community Health* 1985;39(2):141-7. doi: 10.1136/jech.39.2.141 [published Online First: 1985/06/01]



15. McDonald AD, McDonald JC, Armstrong B, et al. Congenital defects and work in pregnancy. *Br J Ind Med* 1988;45(9):581-8. doi: 10.1136/oem.45.9.581 [published Online First: 1988/09/01]
16. McAbee RR, Gallucci BJ, Checkoway H. Adverse reproductive outcomes and occupational exposures among nurses: an investigation of multiple hazardous exposures. *AAOHN J* 1993;41(3):110-9. [published Online First: 1993/03/01]
17. Lorente C, Cordier S, Bergeret A, et al. Maternal occupational risk factors for oral clefts. Occupational Exposure and Congenital Malformation Working Group. *Scand J Work Environ Health* 2000;26(2):137-45. [published Online First: 2000/05/19]
18. Valanis B, Vollmer W, Labuhn K, et al. Occupational exposure to antineoplastic agents and self-reported infertility among nurses and pharmacists. *J Occup Environ Med* 1997;39(6):574-80. [published Online First: 1997/06/01]
19. Fransman W, Roeleveld N, Peelen S, et al. Nurses with dermal exposure to antineoplastic drugs: reproductive outcomes. *Epidemiology* 2007;18(1):112-9. doi: 10.1097/01.ede.0000246827.44093.c1 [published Online First: 2006/11/14]
20. Sessink PJ, Boer KA, Scheefhals AP, et al. Occupational exposure to antineoplastic agents at several departments in a hospital. Environmental contamination and excretion of cyclophosphamide and ifosfamide in urine of exposed workers. *Int Arch Occup Environ Health* 1992;64(2):105-12. [published Online First: 1992/01/01]
21. Sessink PJ, Verplanke AJ, Herber RF, et al. Occupational exposure to antineoplastic agents and parameters for renal dysfunction. *Int Arch Occup Environ Health* 1997;69(3):215-8. [published Online First: 1997/01/01]
22. Ensslin AS, Stoll Y, Pethran A, et al. Biological monitoring of cyclophosphamide and ifosfamide in urine of hospital personnel occupationally exposed to cytostatic drugs. *Occup Environ Med* 1994;51(4):229-33. doi: 10.1136/oem.51.4.229 [published Online First: 1994/04/01]
23. Connor TH, McDiarmid MA. Preventing occupational exposures to antineoplastic drugs in health care settings. *CA Cancer J Clin* 2006;56(6):354-65. [published Online First: 2006/12/01]
24. Guichard N, Rudaz S, Bonnabry P, et al. Validation and uncertainty estimation for trace amounts determination of 25 drugs used in hospital chemotherapy compounding units. *J Pharm Biomed Anal* 2019;172:139-48. doi: 10.1016/j.jpba.2019.04.042 [published Online First: 2019/04/30]
25. Atgé B, Da Silva Cacao O, Ducint D, et al. Tool development for assessing antineoplastic drugs surface contamination in healthcare services and other workplaces. 39th International Congress of the European Association of Poisons Centres and Clinical Toxicologists (EAPCCT) 21-24 May 2019, Naples, Italy [abstract]. *Clinical Toxicology* 2019;57(6):423-602.
26. Colombo M, Jeronimo M, Astrakianakis G, et al. Wipe Sampling Method and Evaluation of Environmental Variables for Assessing Surface Contamination of 10 Antineoplastic Drugs by Liquid Chromatography/Tandem Mass Spectrometry. *Ann Work Expo Health* 2017;61(8):1003-14. doi: 10.1093/annweh/wxx070 [published Online First: 2017/10/14]
27. Dal Bello F, Santoro V, Scarpino V, et al. Antineoplastic drugs determination by HPLC-HRMS(n) to monitor occupational exposure. *Drug Test Anal* 2016;8(7):730-7. doi: 10.1002/dta.1827 [published Online First: 2015/06/05]

- 1
  - 2
  - 3
  - 4
  - 5
  - 6
  - 7
  - 8
  - 9
  - 10
  - 11
  - 12
  - 13
  - 14
  - 15
  - 16
  - 17
  - 18
  - 19
  - 20
  - 21
  - 22
  - 23
  - 24
  - 25
  - 26
  - 27
  - 28
  - 29
  - 30
  - 31
  - 32
  - 33
  - 34
  - 35
  - 36
  - 37
  - 38
  - 39
  - 40
  - 41
  - 42
  - 43
  - 44
  - 45
  - 46
  - 47
  - 48
  - 49
  - 50
  - 51
  - 52
  - 53
  - 54
  - 55
  - 56
  - 57
  - 58
  - 59
  - 60
28. Nussbaumer S, Geiser L, Sadeghipour F, et al. Wipe sampling procedure coupled to LC-MS/MS analysis for the simultaneous determination of 10 cytotoxic drugs on different surfaces. *Anal Bioanal Chem* 2012;402(8):2499-509. doi: 10.1007/s00216-011-5157-2 [published Online First: 2011/06/28]
29. Turci R, Sottani C, Spagnoli G, et al. Biological and environmental monitoring of hospital personnel exposed to antineoplastic agents: a review of analytical methods. *J Chromatogr B Analyt Technol Biomed Life Sci* 2003;789(2):169-209. [published Online First: 2003/05/14]
30. Stokvis E, Rosing H, Beijnen JH. Liquid chromatography-mass spectrometry for the quantitative bioanalysis of anticancer drugs. *Mass Spectrom Rev* 2005;24(6):887-917. doi: 10.1002/mas.20046 [published Online First: 2004/12/16]
31. Nussbaumer S, Bonnabry P, Veuthey JL, et al. Analysis of anticancer drugs: a review. *Talanta* 2011;85(5):2265-89. doi: 10.1016/j.talanta.2011.08.034 [published Online First: 2011/10/04]
32. Sottani C, Tranfo G, Bettinelli M, et al. Trace determination of anthracyclines in urine: a new high-performance liquid chromatography/tandem mass spectrometry method for assessing exposure of hospital personnel. *Rapid Commun Mass Spectrom* 2004;18(20):2426-36. doi: 10.1002/rcm.1642 [published Online First: 2004/09/24]
33. Canal-Raffin M, Khennoufa K, Martinez B, et al. Highly sensitive LC-MS/MS methods for urinary biological monitoring of occupational exposure to cyclophosphamide, ifosfamide, and methotrexate antineoplastic drugs and routine application. *J Chromatogr B Analyt Technol Biomed Life Sci* 2016 doi: 10.1016/j.jchromb.2016.10.021 [published Online First: 2016/12/29]
34. Hedmer M, Tinnerberg H, Axmon A, et al. Environmental and biological monitoring of antineoplastic drugs in four workplaces in a Swedish hospital. *Int Arch Occup Environ Health* 2008;81(7):899-911. doi: 10.1007/s00420-007-0284-y [published Online First: 2007/12/11]
35. Dhersin A, Atge B, Martinez B, et al. Biomonitoring of occupational exposure to 5-FU by assaying alpha-fluoro-beta-alanine in urine with a highly sensitive UHPLC-MS/MS method. *Analyst* 2018;143(17):4110-17. doi: 10.1039/c8an00479j [published Online First: 2018/07/31]
36. Mathias PI, Connor TH, B'Hymer C. A review of high performance liquid chromatographic-mass spectrometric urinary methods for anticancer drug exposure of health care workers. *J Chromatogr B Analyt Technol Biomed Life Sci* 2017;1060:316-24. doi: 10.1016/j.jchromb.2017.06.028 [published Online First: 2017/06/28]
37. Fransman W, Vermeulen R, Kromhout H. Dermal exposure to cyclophosphamide in hospitals during preparation, nursing and cleaning activities. *Int Arch Occup Environ Health* 2005;78(5):403-12. doi: 10.1007/s00420-004-0595-1 [published Online First: 2005/05/12]
38. Mathias PI, MacKenzie BA, Toennis CA, et al. Survey of guidelines and current practices for safe handling of antineoplastic and other hazardous drugs used in 24 countries. *J Oncol Pharm Pract* 2019;25(1):148-62. doi: 10.1177/1078155217726160 [published Online First: 2017/08/26]
39. Barbieri A, Nucci MC, Sabatini L, et al. [Occupational exposure to antineoplastic drugs in a hospital setting: biological and environmental monitoring]. *Epidemiol Prev* 2005;29(5-6 Suppl):87-90. [published Online First: 2006/05/02]

- 1
  - 2
  - 3
  - 4
  - 5
  - 6
  - 7
  - 8
  - 9
  - 10
  - 11
  - 12
  - 13
  - 14
  - 15
  - 16
  - 17
  - 18
  - 19
  - 20
  - 21
  - 22
  - 23
  - 24
  - 25
  - 26
  - 27
  - 28
  - 29
  - 30
  - 31
  - 32
  - 33
  - 34
  - 35
  - 36
  - 37
  - 38
  - 39
  - 40
  - 41
  - 42
  - 43
  - 44
  - 45
  - 46
  - 47
  - 48
  - 49
  - 50
  - 51
  - 52
  - 53
  - 54
  - 55
  - 56
  - 57
  - 58
  - 59
  - 60
40. Kibby T. A review of surface wipe sampling compared to biologic monitoring for occupational exposure to antineoplastic drugs. *J Occup Environ Hyg* 2017;14(3):159-74. doi: 10.1080/15459624.2016.1237026 [published Online First: 2016/09/28]
41. Chauchat L, Tanguay C, Caron NJ, et al. Surface contamination with ten antineoplastic drugs in 83 Canadian centers. *J Oncol Pharm Pract* 2019;25(5):1089-98. doi: 10.1177/1078155218773862 [published Online First: 2018/05/05]
42. Koller M, Bohlandt A, Haberl C, et al. Environmental and biological monitoring on an oncology ward during a complete working week. *Toxicol Lett* 2018;298:158-63. doi: 10.1016/j.toxlet.2018.05.002 [published Online First: 2018/05/09]
43. Dugheri S, Bonari A, Pompilio I, et al. A new approach to assessing occupational exposure to antineoplastic drugs in hospital environments. *Arh Hig Rada Toksikol* 2018;69(3):226-37. doi: 10.2478/aiht-2018-69-3125 [published Online First: 2018/10/05]
44. Sugiura S, Nakanishi H, Asano M, et al. Multicenter study for environmental and biological monitoring of occupational exposure to cyclophosphamide in Japan. *J Oncol Pharm Pract* 2011;17(1):20-8. doi: 10.1177/1078155210369851 [published Online First: 2010/05/18]
45. Sabatini L, Barbieri A, Lodi V, et al. Biological monitoring of occupational exposure to antineoplastic drugs in hospital settings. *Med Lav* 2012;103(5):394-401. [published Online First: 2012/10/20]
46. Poupeau C, Roland C, Bussieres JF. Surveillance urinaire des professionnels de la santé exposés aux antinéoplasiques dans le cadre de leur travail : revue de la littérature de 2010 à 2015. *Can J Hosp Pharm* 2016;69(5):376-87. [published Online First: 2016/11/09]
47. Hon CY, Teschke K, Shen H, et al. Antineoplastic drug contamination in the urine of Canadian healthcare workers. *Int Arch Occup Environ Health* 2015;88(7):933-41. doi: 10.1007/s00420-015-1026-1 [published Online First: 2015/01/30]
48. Friese CR, McArdle C, Zhao T, et al. Antineoplastic drug exposure in an ambulatory setting: a pilot study. *Cancer Nurs* 2015;38(2):111-7. doi: 10.1097/NCC.000000000000143 [published Online First: 2014/05/17]
49. Ramphal R, Bains T, Goulet G, et al. Occupational exposure to chemotherapy of pharmacy personnel at a single centre. *Can J Hosp Pharm* 2015;68(2):104-12. doi: 10.4212/cjhp.v68i2.1435 [published Online First: 2015/05/13]
50. Ramphal R, Bains T, Vaillancourt R, et al. Occupational exposure to cyclophosphamide in nurses at a single center. *J Occup Environ Med* 2014;56(3):304-12. doi: 10.1097/JOM.0000000000000097 [published Online First: 2014/02/01]
51. Baniyadi S, Alehashem M, Yunesian M, et al. Biological Monitoring of Healthcare Workers Exposed to Antineoplastic Drugs: Urinary Assessment of Cyclophosphamide and Ifosfamide. *Iran J Pharm Res* 2018;17(4):1458-64. [published Online First: 2018/12/21]
52. Graeve CU, McGovern PM, Alexander B, et al. Occupational Exposure to Antineoplastic Agents. *Workplace Health Saf* 2017;65(1):9-20. doi: 10.1177/2165079916662660 [published Online First: 2016/10/21]
53. Anonymous. Guideline on bioanalytical method validation: European Medicines Agency, 2011:23.
54. Hon CY, Teschke K, Shen H. Health Care Workers' Knowledge, Perceptions, and Behaviors Regarding Antineoplastic Drugs: Survey From British Columbia, Canada. *J Occup*

- 1  
2  
3 *Environ Hyg* 2015;12(10):669-77. doi: 10.1080/15459624.2015.1029618 [published  
4 Online First: 2015/04/22]  
5  
6 55. Steege AL, Boiano JM, Sweeney MH. NIOSH health and safety practices survey of  
7 healthcare workers: training and awareness of employer safety procedures. *Am J Ind*  
8 *Med* 2014;57(6):640-52. doi: 10.1002/ajim.22305 [published Online First:  
9 2014/02/20]  
10  
11 56. Polovich M, Clark PC. Factors influencing oncology nurses' use of hazardous drug safe-  
12 handling precautions. *Oncol Nurs Forum* 2012;39(3):E299-309. doi:  
13 10.1188/12.ONF.E299-E309 [published Online First: 2012/05/01]  
14  
15 57. Connor TH, DeBord DG, Pretty JR, et al. Evaluation of antineoplastic drug exposure of  
16 health care workers at three university-based US cancer centers. *J Occup Environ*  
17 *Med* 2010;52(10):1019-27. doi: 10.1097/JOM.0b013e3181f72b63 [published Online  
18 First: 2010/10/01]  
19  
20 58. McDiarmid MA, Oliver MS, Roth TS, et al. Chromosome 5 and 7 abnormalities in  
21 oncology personnel handling anticancer drugs. *J Occup Environ Med*  
22 2010;52(10):1028-34. doi: 10.1097/JOM.0b013e3181f73ae6 [published Online First:  
23 2010/10/01]  
24  
25 59. Hirst M, Tse S, Mills DG, et al. Occupational exposure to cyclophosphamide. *Lancet*  
26 1984;1(8370):186-8. doi: 10.1016/s0140-6736(84)92111-1 [published Online First:  
27 1984/01/28]  
28  
29 60. Newman MA, Valanis BG, Schoeny RS, et al. Urinary biological monitoring markers of  
30 anticancer drug exposure in oncology nurses. *Am J Public Health* 1994;84(5):852-5.  
31 doi: 10.2105/ajph.84.5.852 [published Online First: 1994/05/01]  
32  
33 61. Anonymous. Biological Monitoring of Chemical Exposure in the Workplace Guidelines:  
34 World Health Organization, 1996:314.  
35

#### Figure legend/caption:

36  
37 **Figure 1: urine samples collection time.** D: day of participation of nurses in the CACIES  
38 study; swt: start work time; ewt: end work time; S1: urine sample collected within 3 hours  
39 before the start of the work; S2: urine sample collected within 2 hours following the end of  
40 the work; S3: urine sample collected between 7 to 10 hours following the end of the work  
41  
42  
43  
44  
45  
46  
47  
48  
49  
50  
51  
52  
53  
54  
55  
56  
57  
58  
59  
60

1  
2  
3  
4  
5  
6  
7  
8  
9  
10  
11  
12  
13  
14  
15  
16  
17  
18  
19  
20  
21  
22  
23  
24  
25  
26  
27  
28  
29  
30  
31  
32  
33  
34  
35  
36  
37  
38  
39  
40  
41  
42  
43  
44  
45  
46

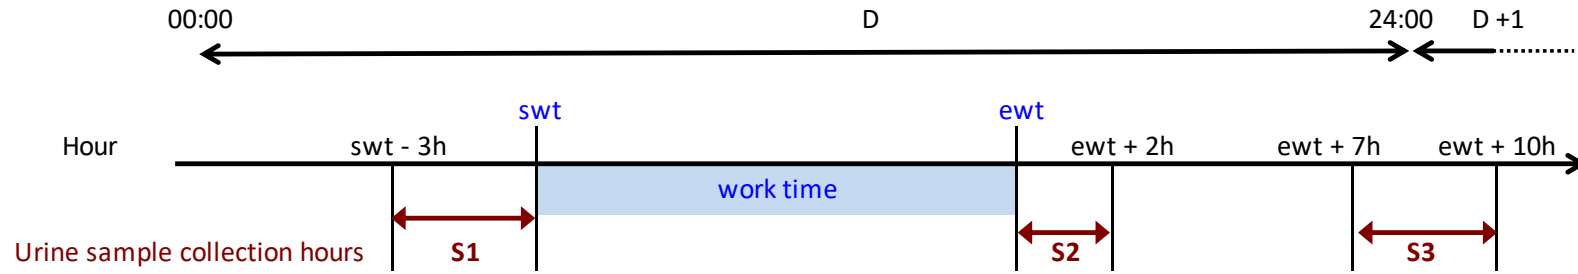

Peer review only
